# Supplementary material
Source: PubMed Central journal article supplement (PMC11458068)
Supplement: NIHMS2023724-supplement-1.pdf [file NIHMS2023724-supplement-1.pdf]

**Supplementary Table 1. Cryo-EM data collection, refinement and validation statistics (whole Sec complex maps)**

|                                                     | Apo<br>(class 1) | Apo<br>(class 2) | Cotransin    | Decatransin  | Apratoxin F  | Mycolactone  | Ipomoeassin F<br>(class 1) | Ipomoeassin F<br>(class 2) | CADA         | ESI          |
|-----------------------------------------------------|------------------|------------------|--------------|--------------|--------------|--------------|----------------------------|----------------------------|--------------|--------------|
| EMDB accession number                               | 29611            | 29612            | 29609        | 29613        | 29610        | 29617        | 29614                      | 29635                      | 29616        | 29618        |
| <b>Data collection and processing</b>               |                  |                  |              |              |              |              |                            |                            |              |              |
| Magnification                                       | 81,000x          | 81,000x          | 81,000x      | 81,000x      | 81,000x      | 81,000x      | 81,000x                    | 81,000x                    | 81,000x      | 81,000x      |
| Voltage (kV)                                        | 300              | 300              | 300          | 300          | 300          | 300          | 300                        | 300                        | 300          | 300          |
| Electron exposure (e <sup>-</sup> /Å <sup>2</sup> ) | 50               | 50               | 50           | 50           | 50           | 50           | 50                         | 50                         | 50           | 50           |
| Defocus range (μm)                                  | -0.8 to -1.6     | -0.8 to -1.6     | -0.8 to -1.6 | -0.8 to -1.6 | -0.8 to -1.6 | -0.8 to -1.6 | -0.8 to -1.6               | -0.8 to -1.6               | -0.8 to -1.6 | -0.8 to -1.6 |
| Pixel size (Å)                                      | 1.05             | 1.05             | 1.05         | 1.05         | 1.05         | 1.05         | 1.05                       | 1.05                       | 1.05         | 1.05         |
| Symmetry imposed                                    | C1               | C1               | C1           | C1           | C1           | C1           | C1                         | C1                         | C1           | C1           |
| Initial particle images (no.)                       | 616,121          | 616,121          | 274,970      | 762,984      | 910,463      | 724,835      | 676,714                    | 676,714                    | 493,200      | 539,081      |
| Final particle images (no.)                         | 188,637          | 147,081          | 137,441      | 452,774      | 497,555      | 245,831      | 145,072                    | 179,540                    | 331,958      | 211,735      |
| Map resolution (Å)                                  | 2.7              | 2.8              | 2.8          | 2.6          | 2.5          | 2.9          | 2.9                        | 2.7                        | 2.9          | 2.8          |
| FSC threshold                                       | 0.143            | 0.143            | 0.143        | 0.143        | 0.143        | 0.143        | 0.143                      | 0.143                      | 0.143        | 0.143        |
| Map resolution range (Å)<br>(min. to 75 percentile) | 2.3–6.5          | 2.5–6.6          | 2.5–6.7      | 2.3–6.0      | 2.4–5.7      | 2.3–6.8      | 2.5–6.6                    | 2.4–6.6                    | 2.4–6.3      | 2.4–6.6      |

**Supplementary Table 2. Cryo-EM data collection, refinement and validation statistics (Sec61 maps and models)**

|                                                     | Sec61, Apo<br>(class 1) | Sec61, Apo<br>(class 2) | Sec61,<br>Cotransin | Sec61,<br>Decatransin | Sec61,<br>Apratoxin F | Sec61,<br>Mycolactone | Sec61,<br>Ipomoeassin F | Sec61,<br>CADA | Sec61,<br>ESI |
|-----------------------------------------------------|-------------------------|-------------------------|---------------------|-----------------------|-----------------------|-----------------------|-------------------------|----------------|---------------|
| PDB accession ID                                    | 8DNV                    | 8DNW                    | 8DNX                | 8DNY                  | 8DNZ                  | 8DO0                  | 8DO1                    | 8DO2           | 8DO3          |
| EMDB accession number                               | 27581                   | 27582                   | 27583               | 27584                 | 27585                 | 27586                 | 27587                   | 27588          | 27589         |
| <b>Data collection and processing</b>               |                         |                         |                     |                       |                       |                       |                         |                |               |
| Magnification                                       | 81,000x                 | 81,000x                 | 81,000x             | 81,000x               | 81,000x               | 81,000x               | 81,000x                 | 81,000x        | 81,000x       |
| Voltage (kV)                                        | 300                     | 300                     | 300                 | 300                   | 300                   | 300                   | 300                     | 300            | 300           |
| Electron exposure (e <sup>-</sup> /Å <sup>2</sup> ) | 50                      | 50                      | 50                  | 50                    | 50                    | 50                    | 50                      | 50             | 50            |
| Defocus range (μm)                                  | -0.8 to -1.6            | -0.8 to -1.6            | -0.8 to -1.6        | -0.8 to -1.6          | -0.8 to -1.6          | -0.8 to -1.6          | -0.8 to -1.6            | -0.8 to -1.6   | -0.8 to -1.6  |
| Pixel size (Å)                                      | 1.05                    | 1.05                    | 1.05                | 1.05                  | 1.05                  | 1.05                  | 1.05                    | 1.05           | 1.05          |
| Symmetry imposed                                    | C1                      | C1                      | C1                  | C1                    | C1                    | C1                    | C1                      | C1             | C1            |
| Initial particle images (no.)                       | 616,121                 | 616,121                 | 274,970             | 762,984               | 910,463               | 724,835               | 676,714                 | 493,200        | 539,081       |
| Final particle images (no.)                         | 188,637                 | 147,081                 | 137,441             | 452,774               | 497,555               | 245,831               | 324,612                 | 331,958        | 211,735       |
| Map resolution (Å)                                  | 3.0                     | 3.4                     | 3.0                 | 2.9                   | 2.6                   | 2.9                   | 3.0                     | 3.0            | 3.2           |
| FSC threshold                                       | 0.143                   | 0.143                   | 0.143               | 0.143                 | 0.143                 | 0.143                 | 0.143                   | 0.143          | 0.143         |
| Map resolution range (Å)<br>(min. to 75 percentile) | 2.6–7.4                 | 2.9–7.5                 | 2.6–7.6             | 2.4–6.4               | 2.3–6.4               | 2.6–7.5               | 2.6–7.6                 | 2.3–7.2        | 2.7–6.9       |
| <b>Refinement</b>                                   |                         |                         |                     |                       |                       |                       |                         |                |               |
| Initial model used                                  | PDB:8DNZ                | PDB:8DNZ                | PDB:7KAH            | PDB:8DNZ              | PDB:8DNX              | PDB:8DNZ              | PDB:8DNZ                | PDB:8DNZ       | PDB:8DNZ      |
| Model resolution (Å)                                | 3.2                     | 3.5                     | 3.1                 | 3.0                   | 2.7                   | 3.1                   | 3.2                     | 3.1            | 3.4           |
| FSC threshold                                       | 0.5                     | 0.5                     | 0.5                 | 0.5                   | 0.5                   | 0.5                   | 0.5                     | 0.5            | 0.5           |
| Map sharpening                                      | -91                     | -100                    | -78                 | -100                  | -77                   | -90                   | -99                     | -96            | -104          |
| B factor (Å <sup>2</sup> )                          |                         |                         |                     |                       |                       |                       |                         |                |               |
| Model composition                                   |                         |                         |                     |                       |                       |                       |                         |                |               |
| Non-hydrogen atoms                                  | 4157                    | 4060                    | 4,271               | 4,331                 | 4,337                 | 4,247                 | 4,339                   | 4,226          | 4,185         |
| Protein residues                                    | 535                     | 528                     | 543                 | 549                   | 551                   | 542                   | 551                     | 541            | 534           |
| Ligands                                             | 0                       | 0                       | 1                   | 1                     | 1                     | 1                     | 1                       | 1              | 1             |
| B factors (Å <sup>2</sup> )                         |                         |                         |                     |                       |                       |                       |                         |                |               |
| Protein                                             | 76.57                   | 49.58                   | 71.46               | 41.25                 | 63.60                 | 52.92                 | 65.58                   | 49.43          | 61.03         |
| Ligand                                              | -                       | -                       | 60.88               | 39.34                 | 56.47                 | 42.82                 | 47.33                   | 47.21          | 62.00         |
| R.m.s. deviations                                   |                         |                         |                     |                       |                       |                       |                         |                |               |
| Bond lengths (Å)                                    | 0.004                   | 0.003                   | 0.004               | 0.003                 | 0.004                 | 0.002                 | 0.003                   | 0.004          | 0.004         |
| Bond angles (°)                                     | 0.593                   | 0.515                   | 0.579               | 0.597                 | 0.513                 | 0.489                 | 0.560                   | 0.650          | 0.582         |
| <b>Validation</b>                                   |                         |                         |                     |                       |                       |                       |                         |                |               |
| MolProbity score                                    | 1.51                    | 1.30                    | 1.47                | 1.47                  | 1.32                  | 1.40                  | 1.67                    | 1.38           | 1.43          |
| Clashscore                                          | 7.53                    | 5.57                    | 6.35                | 7.65                  | 5.90                  | 7.31                  | 10.10                   | 6.98           | 6.70          |
| Poor rotamers (%)                                   | 0                       | 0                       | 0                   | 0                     | 0                     | 0.22                  | 0.22                    | 0.22           | 0             |
| Ramachandran plot                                   |                         |                         |                     |                       |                       |                       |                         |                |               |
| Favored (%)                                         | 0                       | 0                       | 0                   | 0                     | 0                     | 0                     | 0                       | 0              | 0             |
| Allowed (%)                                         | 2.48                    | 1.36                    | 2.63                | 2.22                  | 1.29                  | 1.69                  | 2.76                    | 1.69           | 2.30          |
| Disallowed (%)                                      | 97.52                   | 98.64                   | 97.37               | 97.78                 | 98.71                 | 98.31                 | 97.24                   | 98.31          | 97.70         |

Supplementary Table 3. Effects of mutations in ScSec61 on yeast growth inhibition by cotransin, ipomoeassin F, and decatransin

| ScSec61 aa position | Mutation   | Position in HsSec61A1 | IC50 value (µM)         |               |              | ScSec61 aa position | Mutation                    | Position in HsSec61A1     | IC50 value (µM) |               |              |
|---------------------|------------|-----------------------|-------------------------|---------------|--------------|---------------------|-----------------------------|---------------------------|-----------------|---------------|--------------|
|                     |            |                       | Cotransin               | Ipomoeassin F | Decatransin* |                     |                             |                           | Cotransin       | Ipomoeassin F | Decatransin* |
|                     | WT         |                       | 0.87; 0.55 <sup>#</sup> | 0.06          | 3.1; 1.2*    | 182                 | S182D                       | S180                      | 1.34            | <0.06         |              |
| 47                  | G47D       | C46                   | >200*                   |               | 100*         | 182                 | S182W                       | S180                      | >200            | 0.06          |              |
| 63                  | L63D       | F62                   | >200                    | 0.40          |              | 185                 | T185D                       | I183                      | >200            | >100          |              |
| 63                  | L63W       | F62                   | 0.43                    | 0.25          |              | 185                 | T185W                       | I183                      | 0.60            |               |              |
| 63                  | L63N       | F62                   | >200                    | <0.06         | 2.9*         | 186                 | A186T                       | A184                      | 0.3*            |               | 2.4*         |
| 71                  | A71D       | A70                   | 1.4*                    |               | 3*           | 287                 | Y287D                       | Y285                      | >200            |               |              |
| 72                  | S72F       | S71                   | >200                    | 0.17          | >200*        | 287                 | Y287W                       | Y285                      | 5.32            |               |              |
| 79                  | E79K       | E78                   | >200*                   |               | >200*        | 291                 | T291W                       | I289                      | 0.83            | 13.0          |              |
| 81                  | G81D       | G80                   | >200*                   |               | 3.6*         | 291                 | T291D                       | I289                      | 3.05            | 0.07          |              |
| 82                  | V82D       | I81                   | >200                    | >100          |              | 294                 | M294D                       | I292                      | >200            | >100          |              |
| 82                  | V82W       | I81                   | >200                    |               |              | 294                 | M294W                       | I292                      | 1.06            |               |              |
| 84                  | P84L       | P83                   | >200*                   |               | >200*        | 296                 | Q296D                       | Q294                      | 1.07            | 0.14          |              |
| 86                  | I86T       | V85                   | 0.54                    | <0.06         |              | 296                 | Q296W                       | Q294                      | 0.59            | <0.06         |              |
| 86                  | I86D       | V85                   | >200                    | <0.06         |              | 298                 | A298T                       | A296                      | >200*           |               | >200*        |
| 86                  | I86W       | V85                   | 2.08                    |               |              | 302                 | N302L                       | N300                      | >200            | >100          | >100         |
| 87                  | T87I       | T86                   | >200*                   |               | >200*        | 302                 | N302D                       | N300                      | 0.51            | >100          |              |
| 89                  | S89D       | G88                   | 1.10                    | <0.06         |              | 302                 | N302W                       | N300                      | >200            | >100          |              |
| 89                  | S89W       | G88                   | 1.00                    | 0.09          |              | 305                 | L305D                       | V303                      | >200            | 11.7          |              |
| 90                  | M90D       | L89                   | >200                    | >100          |              | 305                 | L305W                       | V303                      | >200            | <0.06         |              |
| 90                  | M90W       | L89                   | 1.06                    | 0.13          |              | 307                 | S307D                       | S305                      | 1.37            | <0.06         |              |
| 93                  | Q93D       | Q92                   | 2.72                    | 0.07          |              | 307                 | S307W                       | S305                      | >200            | 0.58          |              |
| 93                  | Q93W       | Q92                   | 0.53                    | 0.12          |              | 307                 | S307F                       | S305                      | >200*           |               | >200*        |
| 96                  | Q96D       | A95                   | 0.77                    | <0.06         |              | 379                 | T379D                       | T378                      | 1.07            | 0.09          |              |
| 96                  | Q96W       | A95                   | 1.10                    | 0.07          |              | 379                 | T379W                       | T378                      | 0.59            | <0.06         |              |
| 97                  | G97D       | G96                   | 0.62; 0.3*              | 1.48          | >200*        | 380                 | W380D                       | W379                      | 1.07            | 0.15          |              |
| 97                  | G97W       | G96                   | 1.04                    | 0.06          |              | 382                 | E382D                       | E381                      | 1.09            | <0.06         |              |
| 111                 | R111D      | R109                  | 1.15                    | <0.06         |              | 382                 | E382W                       | E381                      | 1.70            | <0.06         |              |
| 111                 | R111W      | R109                  | 0.87                    | <0.06         |              | 384                 | S384D                       | S383                      | 2.01            | <0.06         |              |
| 115                 | Q115D      | N113                  | 1.84                    | <0.06         |              | 384                 | S384W                       | S383                      | 0.60            | 0.19          |              |
| 115                 | Q115W      | N113                  | 1.05                    | <0.06         |              | 386                 | T386D                       | S385                      | 1.44            | <0.06         |              |
| 129                 | Q129D      | Q127                  | >200                    | 0.28          |              | 386                 | T386W                       | S385                      | 1.11            | <0.06         |              |
| 129                 | Q129W      | Q127                  | >200                    | >100          |              | 430                 | G430D                       | G429                      | 0.5*            |               | 3.7*         |
| 129                 | Q129L      | Q127                  | 0.58; 1.1 <sup>#</sup>  | 18.3          | >100         | 446                 | A446T                       | T445                      | 1.3*            |               | 2.7*         |
| 168                 | D168W      | D166                  | 0.22                    | <0.06         |              | 450                 | M450D                       | L449                      | 4.04            | 0.87          |              |
| 172                 | S172D      | Q170                  | 1.09                    | <0.06         |              | 450                 | M450W                       | L449                      | 2.15            |               |              |
| 172                 | S172W      | Q170                  | 0.88                    | 0.07          |              | 454                 | T454D                       | I453                      | 0.46            | <0.06         |              |
| 178                 | G178D      | G176                  | 1.18                    | <0.06         |              | 454                 | T454W                       | I453                      | <0.1            | <0.06         |              |
| 178                 | G178W      | G176                  | 0.52                    | <0.06         |              | 461                 | A461D                       | I460                      | 1.36            |               |              |
| 179                 | S179D      | S177                  | 1.03                    | <0.06         |              | 461                 | A461W                       | I460                      | 0.86            |               |              |
| 179                 | S179W      | S177                  | 0.26                    | <0.06         |              | 480                 | M480D                       | L475                      | 1.01            |               |              |
| 179                 | S179A      | S177                  | 0.82                    |               |              | 480                 | M480W                       | L475                      | 1.03            |               |              |
| 179                 | S179C      | S177                  | 0.68                    |               |              | multiple            | ΔPlug (52-74→G)             |                           | >200            | >100          |              |
| 179                 | S179F      | S177                  | 0.56                    |               |              | multiple            | V82D/I86D/ M294K            | I81/V85/ I292             | >200            |               |              |
| 179                 | S179G      | S177                  | 0.80                    |               |              | multiple            | V82D/I86D/ M450K            | I81/V85/ L449             | >200            |               |              |
| 179                 | S179H      | S177                  | 1.00                    |               |              | multiple            | I181D/T185D /M450K          | I179/I183/ L499           | >200            |               |              |
| 179                 | S179I      | S177                  | 0.53                    |               |              | multiple            | Q308/I323/ W326/L342A       | Q306/L321/ W324/L341      | >200            |               |              |
| 179                 | S179K      | S177                  | 0.57                    |               |              | multiple            | I86T/Q308/ I323/W326/ L342A | V85/Q306/ L321/W324/ L341 | >200            |               |              |
| 179                 | S179L      | S177                  | 1.03                    |               |              | multiple            | Q96W/Q99H                   | A95/K98                   | 0.89            |               |              |
| 179                 | S179M      | S177                  | 1.01                    |               |              |                     |                             |                           |                 |               |              |
| 179                 | S179N      | S177                  | 1.04                    |               |              |                     |                             |                           |                 |               |              |
| 179                 | S179Q      | S177                  | 1.13                    |               |              |                     |                             |                           |                 |               |              |
| 179                 | S179R      | S177                  | 0.54                    |               |              |                     |                             |                           |                 |               |              |
| 179                 | S179S(=WT) | S177                  | 0.91                    |               |              |                     |                             |                           |                 |               |              |
| 179                 | S179T      | S177                  | 0.98                    |               |              |                     |                             |                           |                 |               |              |
| 179                 | S179V      | S177                  | 0.80                    |               |              |                     |                             |                           |                 |               |              |
| 179                 | S179Y      | S177                  | 0.56                    |               |              |                     |                             |                           |                 |               |              |
| 181                 | I181D      | I179                  | 0.59                    | <0.06         |              |                     |                             |                           |                 |               |              |
| 181                 | I181W      | I179                  | <0.1                    |               |              |                     |                             |                           |                 |               |              |

Gray highlight: IC50 larger than 5x but less than 100x of IC50 of WT.

Yellow highlight: IC50 larger than 100x of IC50 of WT.

Blank: not determined.

\* Data from Junne et al., doi:10.1242/jcs.165746.

# Values measured with the strain BY4743Δ9aURA harboring pDQ1.

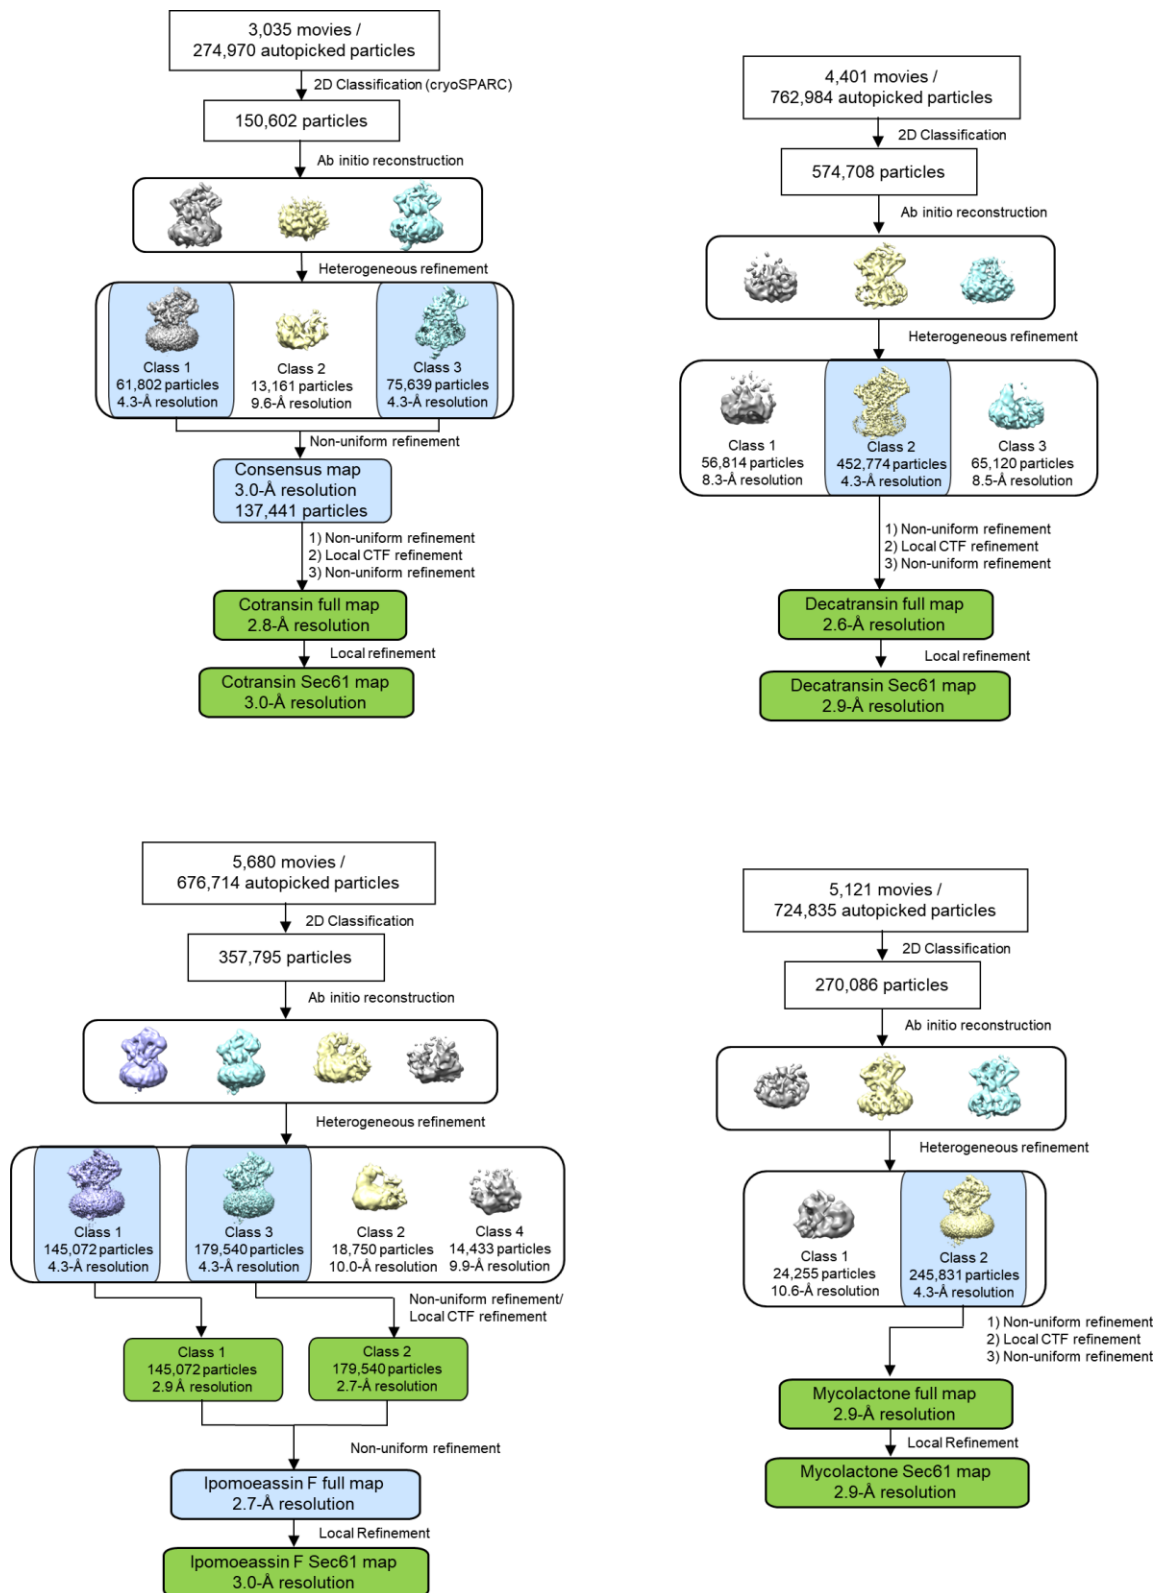

**Supplementary Fig. 1. Additional schematics of single-particle cryo-EM image analysis workflow.**

As in Extended Data Fig. 4b, but showing the datasets for the chimeric Sec complex in association with cotransin, decatransin, ipomoeassin F, or mycolactone.

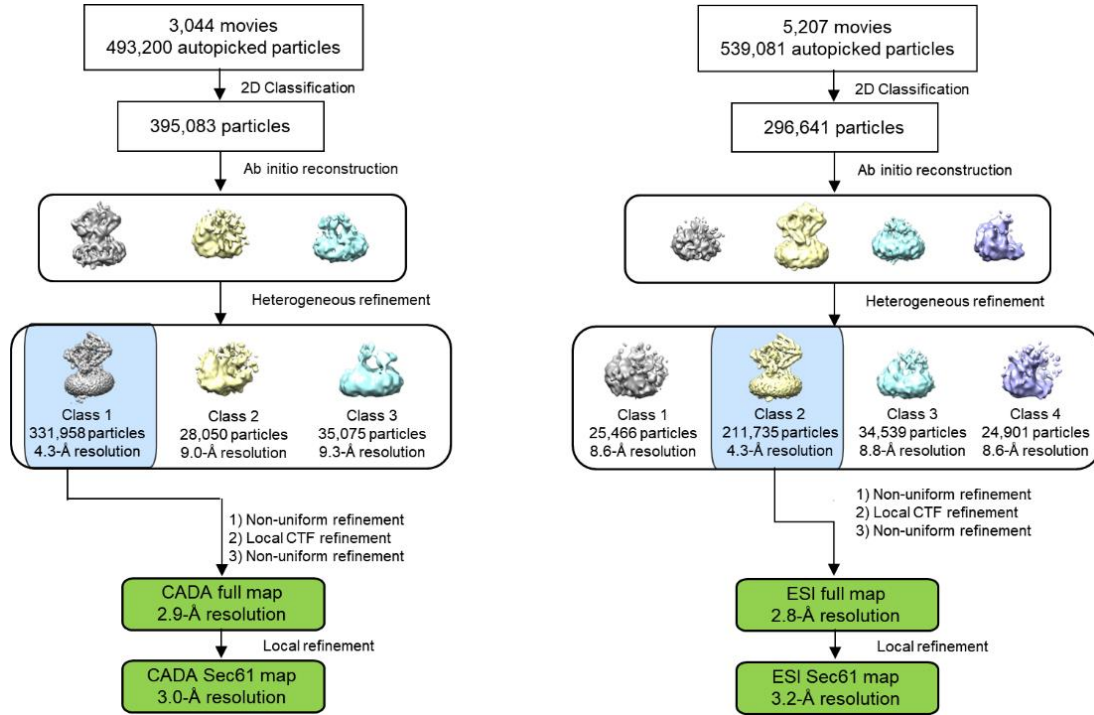

**Supplementary Fig. 2. Additional schematics of single-particle cryo-EM image analysis workflow.**

As in Extended Data Fig. 4b, but showing the datasets for the chimeric Sec complexes in association with CADA or ESI.
